# Supplementary material for: Reliability of sonographic measurements of the ulnar collateral ligament: a multi-rater prospective study
Source: PeerJ. 2023 Jun 6;11:e15418. doi: 10.7717/peerj.15418 (PMC10252878; doi:10.7717/peerj.15418)
Supplement: Data S1 [file peerj-11-15418-s001.xlsx]

## Sheet: Sheet1
	8/20/2012 AVD Mid-Sub (cm) AVD measure	8/20/2012 AVD Apex Trochela (.cm) AVD measure	8/20/2012 AVD Mid-Sub (cm) AVD 2nd measure	8/20/2012 AVD Apex Trochela (.cm) AVD 2nd measure	8/20/2012 AVD Mid-Sub (cm) AVD 3rd measure	8/20/2012 AVD Apex Trochela (.cm) AVD 3rd measure	8/20/2012 AVD Mid-Sub (cm) SDF measure	8/20/2012 AVD Apex Trochela (.cm) SDF measure	8/20/2012 AVD Mid-Sub (cm) SDF 2nd measure	8/20/2015 AVD Apex Trochela (.cm) SDF 2nd measure	8/20/2012 AVD Mid-Sub (cm) SDF 3rd measure	8/20/2012 AVD Apex Trochela (.cm) SDF 3rd measure	8/20/2012 SDF Mid-Sub (cm) AVD measure	8/20/2012 SDF Apex Trochela (.cm) AVD measure	8/20/2012 SDF Mid-Sub (cm) AVD 2nd measure	8/20/2012 SDF Apex Trochela (.cm) AVD 2nd measure	8/20/2015 SDF Mid-Sub (cm) AVD 3rd measure	8/20/2012 SDF Apex Trochela (.cm) AVD 3rd measure	8/20/2012 sdf Mid-Sub (cm) SDF measure	8/20/2015 sdf Apex Trochela (.cm) SDF measure	8/20/2012 sdf Mid-Sub (cm) SDF 2nd measure	8/20/2012 sdfApex Trochela (.cm) SDF 2nd measure	8/20/2012 SDF Mid-Sub (cm) SDF 3rd measure	8/20/2012 SDF Apex Trochela (.cm) SDF 3rd measure	10/10/2012AVD Mid-Sub (cm) AVD measure	10/10/2012 AVD Apex Trochela (.cm) AVD measure	10/10/2012 AVD Mid-Sub (cm) AVD 2nd measure	10/10/2012 AVD Apex Trochela (.cm) AVD 2nd measure	10/10/2012 AVD Mid-Sub (cm) AVD 3rd measure	10/10/2012 AVD Apex Trochela (.cm) AVD 3rd measure	10/10/2012 AVD Mid-Sub (cm) SDF measure	10/10/2012 AVD Apex Trochela (.cm) SDF measure	10/10/2012 AVD Mid-Sub (cm) SDF 2nd measure	10/20/2012 AVD Apex Trochela (.cm) SDF 2nd measure	0/2012 AVD Mid-Sub (cm) SDF 3rd measure	10/10/2012 AVD Apex Trochela (.cm) SDF 3rd measure	10/10/2012 SDF Mid-Sub (cm) AVD measure	10/10/2012 SDF Apex Trochela (.cm) AVD measure	10/10/2012 SDF Mid-Sub (cm) AVD 2nd measure	10/10/2012 SDF Apex Trochela (.cm) AVD 2nd measure	10/10/2015 SDF Mid-Sub (cm) AVD 3rd measure	10/10/2012 SDF Apex Trochela (.cm) AVD 3rd measure	10/10/2012 sdf Mid-Sub (cm) SDF measure	10/10/2012 sdf Apex Trochela (.cm) SDF measure	10/10/2012 sdf Mid-Sub (cm) SDF 2nd measure	10/10/2012 sdfApex Trochela (.cm) SDF 2nd measure	10/10/2012 SDF Mid-Sub (cm) SDF 3rd measure	10/10/2012 SDF Apex Trochela (.cm) SDF 3rd measure	11/13/2012AVD Mid-Sub (cm) AVD measure
1	0.39	0.4	0.42	0.4	0.4	0.4	0.4	0.38	0.45	0.37	0.44	0.38	0.45	0.36	0.4	0.34	0.43	0.38	0.43	0.37	0.46	0.38	0.43	0.37	0.59	0.49	0.54	0.49	0.58	0.49	0.57	0.46	0.6	0.42	0.57	0.4	0.55	0.48	0.53	0.43	0.51	0.44	0.43	0.31	0.4	0.3	0.46	0.32	0.5
2	0.57	0.51	0.54	0.54	0.56	0.56	0.58	0.53	0.62	0.55	0.66	0.55	0.63	0.57	0.64	0.54	0.65	0.58	0.64	0.63	0.63	0.63	0.67	0.63	0.54	0.41	0.53	0.42	0.54	0.43	0.62	0.38	0.59	0.41	0.54	0.35	0.61	0.41	0.6	0.39	0.59	0.4	0.54	0.41	0.52	0.42	0.52	0.38	0.64
3	0.35	0.32	0.35	0.31	0.33	0.32	0.48	0.34	0.45	0.34	0.46	0.32	0.33	0.23	0.31	0.24	0.32	0.23	0.37	0.23	0.43	0.23	0.39	0.22	0.4	0.27	0.4	0.26	0.39	0.27	0.4	0.27	0.43	0.22	0.41	0.23	0.39	0.31	0.45	0.32	0.43	0.31	0.42	0.26	0.47	0.26	0.47	0.26	0.5
4	0.56	0.5	0.57	0.54	0.59	0.57	0.66	0.51	0.65	0.57	0.56	0.61	0.61	0.56	0.63	0.58	0.62	0.57	0.63	0.46	0.63	0.55	0.66	0.51	0.44	0.38	0.45	0.4	0.47	0.41	0.49	0.4	0.47	0.43	0.5	0.41	0.45	0.24	0.45	0.24	0.43	0.24	0.45	0.32	0.43	0.27	0.45	0.28	0.46
5	0.34	0.26	0.33	0.24	0.34	0.25	0.39	0.23	0.39	0.22	0.39	0.23	0.34	0.24	0.35	0.24	0.36	0.25	0.37	0.25	0.36	0.23	0.39	0.23	0.5	0.32	0.5	0.28	0.52	0.29	0.5	0.3	0.53	0.28	0.51	0.29	0.46	0.29	0.46	0.33	0.46	0.32	0.46	0.32	0.47	0.32	0.48	0.33	0.5
6	0.46	0.33	0.46	0.31	0.44	0.34	0.44	0.3	0.45	0.3	0.44	0.28	0.52	0.34	0.46	0.36	0.47	0.37	0.46	0.34	0.48	0.33	0.48	0.34	0.51	0.27	0.47	0.29	0.49	0.33	0.49	0.33	0.49	0.32	0.49	0.32	0.4	0.26	0.41	0.27	0.38	0.27	0.42	0.29	0.42	0.31	0.48	0.3	0.43
7	0.5	0.39	0.51	0.39	0.54	0.39	0.59	0.36	0.63	0.37	0.64	0.38	0.5	0.37	0.64	0.36	0.62	0.35	0.68	0.36	0.71	0.37	0.69	0.36	0.54	0.33	0.47	0.43	0.5	0.32	0.52	0.37	0.55	0.35	0.53	0.34	0.6	0.34	0.56	0.34	0.57	0.36	0.58	0.37	0.59	0.38	0.59	0.38	0.6
8	0.4	0.4	0.41	0.39	0.42	0.39	0.45	0.37	0.44	0.37	0.46	0.37	0.42	0.34	0.41	0.32	0.43	0.34	0.45	0.32	0.47	0.32	0.47	0.32	0.42	0.3	0.44	0.32	0.42	0.31	0.44	0.33	0.44	0.32	0.42	0.32	0.43	0.31	0.42	0.31	0.42	0.29	0.42	0.32	0.41	0.31	0.43	0.31	0.46
9	0.43	0.29	0.46	0.3	0.45	0.3	0.48	0.26	0.44	0.23	0.47	0.23	0.49	0.3	0.49	0.31	0.51	0.3	0.46	0.25	0.46	0.23	0.46	0.24	0.51	0.36	0.54	0.36	0.54	0.35	0.54	0.35	0.52	0.37	0.53	0.35	0.47	0.31	0.47	0.31	0.49	0.31	0.54	0.39	0.55	0.38	0.56	0.38	0.45
10	0.45	0.28	0.49	0.28	0.47	0.28	0.49	0.2	0.52	0.23	0.51	0.24	0.49	0.33	0.48	0.32	0.48	0.32	0.51	0.28	0.51	0.28	0.54	0.28	0.49	0.36	0.5	0.37	0.58	0.36	0.59	0.42	0.62	0.42	0.58	0.4	0.55	0.31	0.55	0.31	0.57	0.31	0.58	0.34	0.58	0.34	0.59	0.35	0.54
11	0.35	0.26	0.34	0.27	0.33	0.28	0.39	0.25	0.39	0.24	0.39	0.23	0.34	0.22	0.35	0.22	0.35	0.23	0.38	0.25	0.4	0.22	0.4	0.26	0.39	0.24	0.42	0.21	0.41	0.23	0.43	0.25	0.42	0.24	0.4	0.24	0.4	0.22	0.41	0.21	0.41	0.22	0.44	0.25	0.43	0.24	0.41	0.28	0.46
12	0.6	0.32	0.61	0.38	0.62	0.4	0.62	0.37	0.66	0.41	0.67	0.39	0.6	0.31	0.56	0.33	0.59	0.32	0.61	0.31	0.63	0.32	0.64	0.34	0.48	0.25	0.5	0.27	0.46	0.26	0.53	0.29	0.55	0.28	0.53	0.28	0.4	0.24	0.38	0.23	0.41	0.24	0.48	0.24	0.44	0.25	0.39	0.25	0.54
13	0.56	0.39	0.56	0.45	0.58	0.42	0.5	0.47	0.56	0.42	0.63	0.43	0.54	0.39	0.58	0.39	0.58	0.42	0.54	0.37	0.5	0.38	0.51	0.37	0.55	0.4	0.6	0.41	0.6	0.42	0.59	0.42	0.59	0.43	0.61	0.45	0.57	0.42	0.55	0.43	0.6	0.43	0.61	0.41	0.64	0.45	0.59	0.4	0.6
14	0.62	0.43	0.65	0.4	0.66	0.39	0.52	0.29	0.47	0.32	0.49	0.32	0.57	0.42	0.61	0.44	0.58	0.41	0.42	0.31	0.5	0.39	0.53	0.36	0.54	0.38	0.57	0.37	0.58	0.36	0.54	0.33	0.52	0.32	0.52	0.3	0.52	0.29	0.5	0.26	0.52	0.24	0.6	0.29	0.53	0.26	0.58	0.28	0.55
15	0.67	0.57	0.73	0.57	0.72	0.57	0.74	0.58	0.69	0.59	0.72	0.6	0.73	0.6	0.72	0.59	0.7	0.6	0.74	0.61	0.73	0.61	0.74	0.61	0.65	0.32	0.67	0.31	0.68	0.34	0.68	0.36	0.67	0.35	0.69	0.34	0.66	0.34	0.7	0.34	0.68	0.34	0.74	0.46	0.66	0.49	0.67	0.45	999
16	0.5	0.3	0.49	0.3	0.53	0.3	0.46	0.3	0.39	0.26	0.42	0.29	0.52	0.27	0.51	0.21	0.51	0.23	0.34	0.21	0.41	0.22	0.4	0.23	0.57	0.35	0.59	0.33	0.58	0.33	0.58	0.31	0.55	0.37	0.57	0.35	0.59	0.36	0.62	0.34	0.62	0.34	0.64	0.36	0.58	0.36	0.61	0.32	0.48
17	0.37	0.26	0.4	0.27	0.41	0.28	0.4	0.25	0.38	0.25	0.44	0.24	0.47	0.32	0.45	0.34	0.43	0.35	0.47	0.28	0.5	0.29	0.47	0.28	0.48	0.31	0.56	0.3	0.56	0.29	0.59	0.28	0.59	0.28	0.58	0.28	0.53	0.26	0.5	0.26	0.5	0.23	0.5	0.24	0.49	0.23	0.51	0.24	0.5
[truncated: 71 more columns]
